# Supplementary material
Source: HighWire-hosted journal article supplement (https://jitc.bmj.com/content/8/2/e001302)

Figure S2

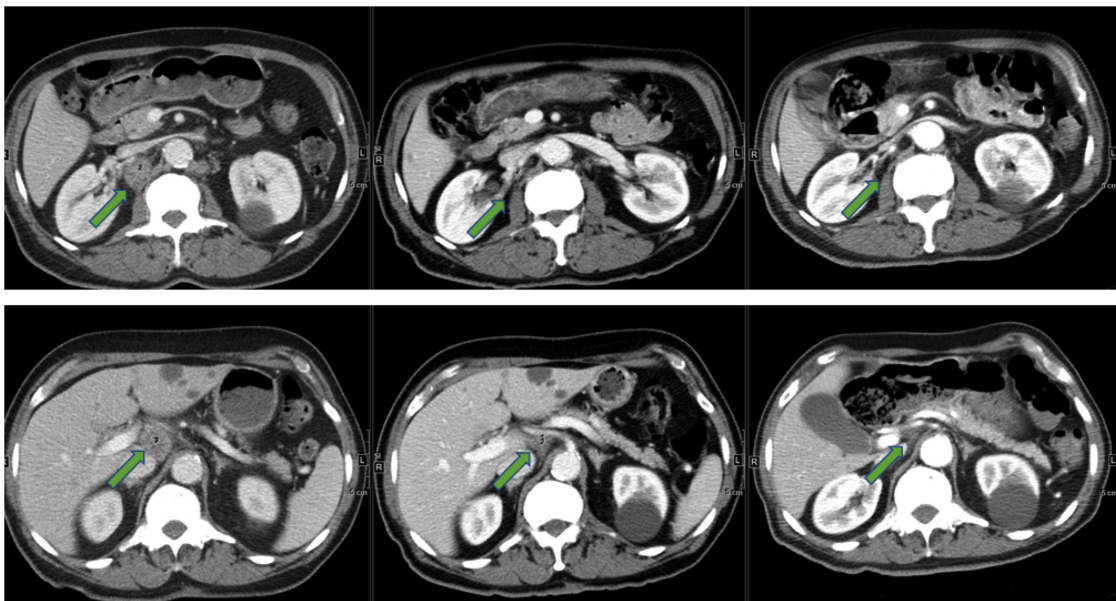

Supplement: inline-supplementary-material-2 [file inline-supplementary-material-2.pdf]
